# Supplementary material
Source: publisher site journal article supplement (https://www.dovepress.com/article/263961)
Supplement: Supplementary file 1 [file get_supplementary_file.php]

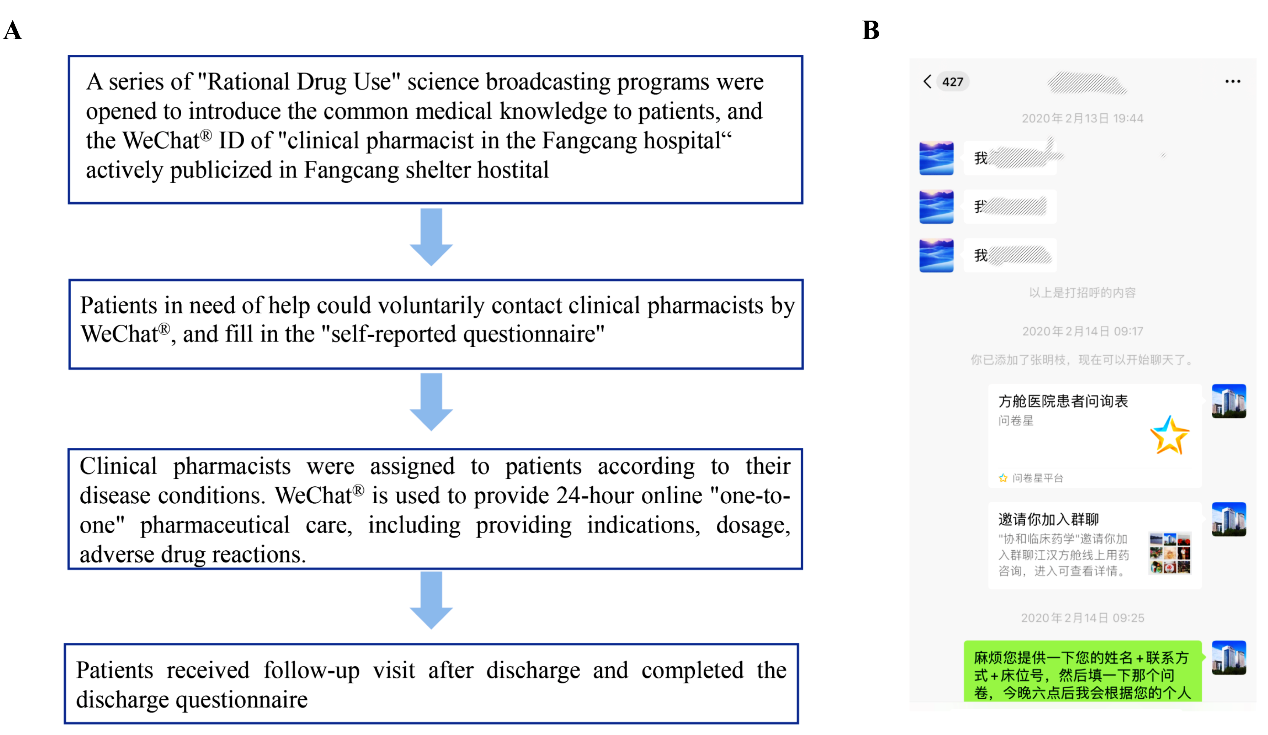


Fig S1: The whole process of online pharmaceutical care. (A) The flow chart; (B) Wechat interface to provide pharmaceutical care for a patient.

Table S1 The questionnaire designed for patients.

| **General Information** | | | | | |
| --- | --- | --- | --- | --- | --- |
| Name |  | Gender |  | Age |  |
| **Symptom** | | | | | |
| Fever | Yes* No* | Temp |  | Onset |  |
| Cough | Yes* No* | Sputum | Yes* No* | Color of sputum |  |
| Short of breath | Yes* No* | Difficult breathing | Yes* No* | chest pain | Yes* No* |
| Running noses/Stuffed nose | Yes* No* | Sneeze | Yes* No* | Eye discomfort | Yes* No* |
| Nausea/Vomit | Yes* No* | Diarrhea | Yes* No* | muscle/head pain | Yes* No* |
| 1st visit time |  | 1st visit location |  | Time of diagnose |  |
| Mental status | great fair poor | dietary status | great fair poor | sleep quality | great fair poor |
| **History** | | | | | |
| History | Hypertension* Hyperlipidemia* Diabetes* Cancer* Cardiovascular Disease* Kidney Disease* Thyoids Disease* Other* | | | | |
| **Rountine medication** | | | | | |
| COVID medicine | *Ribavirin *Arbidol *Oseltamivir *Cefedinir *Moxiflaxin *Levoflaxin *Lotus Antipyretic *Ibuprofen *Suhuang Anticough *Methoxyphenamine Hcl *Interferon therapy | | | | |
| Other medication |  | | | | |

Table S2A: Collinearity analysis of Tolerance and VIF between the included variables of logistic regression

|  | Collinearity | |
| --- | --- | --- |
| Tolerance | VIF |
| Constant |  |  |
| Age | 0.722 | 1.385 |
| Dyspnea | 0.879 | 1.137 |
| Diarrhea | 0.912 | 1.097 |
| Hypertension | 0.831 | 1.203 |
| Diabetes | 0.840 | 1.190 |
| hsCRP | 0.803 | 1.245 |
| Lymphocyte count | 0.922 | 1.084 |
| Sleep status | 0.854 | 1.171 |

Table S2B: Collinearity analysis of Eigenvalue and Condition index between the included variables of logistic regression

|  | Eigenvalue | Condition index | Variance Proportion | | | | | | | | |
| --- | --- | --- | --- | --- | --- | --- | --- | --- | --- | --- | --- |
| Constant | Age | Dyspnea | Diarrhea | Hypertension | Diabetes | hsCRP | Lymphocyte count | Sleep status |
| 1 | 5.058 | 1.000 | 0.00 | 0.00 | 0.01 | 0.01 | 0.01 | 0.00 | 0.01 | 0.00 | 0.01 |
| 2 | 1.040 | 2.205 | 0.00 | 0.00 | 0.01 | 0.01 | 0.21 | 0.43 | 0.01 | 0.00 | 0.01 |
| 3 | 0.800 | 2.515 | 0.00 | 0.00 | 0.01 | 0.03 | 0.32 | 0.13 | 0.21 | 0.02 | 0.00 |
| 4 | 0.692 | 2.704 | 0.00 | 0.00 | 0.49 | 0.05 | 0.03 | 0.04 | 0.09 | 0.02 | 0.02 |
| 5 | 0.521 | 3.116 | 0.00 | 0.00 | 0.26 | 0.00 | 0.29 | 0.20 | 0.47 | 0.00 | 0.00 |
| 6 | 0.425 | 3.450 | 0.00 | 0.00 | 0.03 | 0.85 | 0.05 | 0.10 | 0.07 | 0.02 | 0.00 |
| 7 | 0.347 | 3.818 | 0.00 | 0.00 | 0.19 | 0.00 | 0.00 | 0.01 | 0.03 | 0.03 | 0.90 |
| 8 | 0.099 | 7.150 | 0.04 | 0.12 | 0.00 | 0.03 | 0.07 | 0.02 | 0.07 | 0.74 | 0.05 |
| 9 | 0.019 | 16.521 | 0.95 | 0.87 | 0.00 | 0.00 | 0.02 | 0.06 | 0.03 | 0.17 | 0.00 |

Table S3 The questionnaire designed for discharged patients.

| **General Information** | | | | | |
| --- | --- | --- | --- | --- | --- |
| Name |  | Gender |  | Age |  |
| Admission time |  | Discharge time |  | | |
| **Accepted Pharmaceutical Care** | | | | | |
| disease prevention | Yes* No* | Infectious control | Yes* No* | Route of disease transmission | Yes* No* |
| Inappropriate combination of drugs | Yes* No* | Dosage | Yes* No* | Treatment course of antibiotic and antiviral | Yes* No* |
| Drug interaction problems | Yes* No* | Adverse reactions | Yes* No* | Other medication issues | Yes* No* |
| Environmental problems in Fangcang hospital | Yes* No* | Psychological counseling | Yes* No* | others | Yes* No* |
| **Patient Satisfaction** | | | | | |
| Patient satisfaction | 5: Very Satisfied 4: Somewhat Satisfied 3: Neutral 2: Somewhat Unsatisfied 1: Very Unsatisfied | | | | |
| Suggestion |  | | | | |
